# Supplementary material for: Tracking the introduction and spread of SARS-CoV-2 in coastal Kenya
Source: Research Square preprint supplement (doi:10.21203/rs.3.rs-93975/v1), 2020-10-26
Supplement: Supplementary file 1 [file 421bdf800a187f4720afca13.docx]

|  | **Kilifi (N=8)** | **Kwale (N=32)** | **Mombasa (N=212)** | **Taita Taveta (N=22)** | **Total (N=274)** |
| --- | --- | --- | --- | --- | --- |
| **Sex** |  |  |  |  |  |
| Female | 4 (50.0%) | 2 (6.2%) | 75 (35.4%) | 0 (0%) | 81 (29.6%) |
| Male | 2 (25.0%) | 29 (90.6%) | 118 (55.7%) | 20 (90.9%) | 169 (61.7%) |
| Unknown | 2 (25.0%) | 1 (3.1%) | 19 (9.0%) | 2 (9.1%) | 24 (8.8%) |
| **Age** |  |  |  |  |  |
| Mean (SD) | 37.0 (11.8) | 35.3 (12.3) | 41.4 (16.5) | 38.2 (8.82) | 40.3 (15.6) |
| Median [Min, Max] | 35.0 [30.0, 63.0] | 33.5 [0, 56.0] | 40.0 [1.00, 85.0] | 37.0 [22.0, 56.0] | 39.0 [0, 85.0] |
| Missing | 1 (12.5%) | 0 (0%) | 10 (4.7%) | 0 (0%) | 11 (4.0%) |
| **Age category** |  |  |  |  |  |
| 0-9 | 0 (0%) | 1 (3.1%) | 5 (2.4%) | 0 (0%) | 6 (2.2%) |
| 10-19 | 0 (0%) | 1 (3.1%) | 9 (4.2%) | 0 (0%) | 10 (3.6%) |
| 20-29 | 0 (0%) | 8 (25.0%) | 34 (16.0%) | 3 (13.6%) | 45 (16.4%) |
| 30-39 | 6 (75.0%) | 12 (37.5%) | 50 (23.6%) | 9 (40.9%) | 77 (28.1%) |
| 40-49 | 0 (0%) | 4 (12.5%) | 35 (16.5%) | 7 (31.8%) | 46 (16.8%) |
| 50-59 | 0 (0%) | 6 (18.8%) | 39 (18.4%) | 3 (13.6%) | 48 (17.5%) |
| 60-69 | 1 (12.5%) | 0 (0%) | 21 (9.9%) | 0 (0%) | 22 (8.0%) |
| 70-79 | 0 (0%) | 0 (0%) | 6 (2.8%) | 0 (0%) | 6 (2.2%) |
| 80-89 | 0 (0%) | 0 (0%) | 3 (1.4%) | 0 (0%) | 3 (1.1%) |
| Unknown | 1 (12.5%) | 0 (0%) | 10 (4.7%) | 0 (0%) | 11 (4.0%) |
| **Case history** |  |  |  |  |  |
| Local | 2 (25.0%) | 1 (3.1%) | 90 (42.5%) | 0 (0%) | 93 (33.9%) |
| Travel associated | 1 (12.5%) | 17 (53.1%) | 8 (3.8%) | 0 (0%) | 26 (9.5%) |
| Border | 0 (0%) | 13 (40.6%) | 18 (8.5%) | 22 (100%) | 53 (19.3%) |
| Unknown | 5 (62.5%) | 1 (3.1%) | 96 (45.3%) | 0 (0%) | 102 (37.2%) |
| **Symptoms** |  |  |  |  |  |
| Asymptomatic | 4 (50.0%) | 17 (53.1%) | 98 (46.2%) | 15 (68.2%) | 134 (48.9%) |
| Symptomatic | 3 (37.5%) | 0 (0%) | 41 (19.3%) | 1 (4.5%) | 45 (16.4%) |
| Unknown | 1 (12.5%) | 15 (46.9%) | 73 (34.4%) | 6 (27.3%) | 95 (34.7%) |

**Table S1:** Demographic characteristics of SARS-CoV-2 whole genome sequenced samples (>80% complete) collected between March and June 2020 (n=274) from coastal Kenya stratified by county. The case history demographic characteristic was derived from both self-reported travel history and presentation at a border point. Local case-history refers to individuals that did not report a history of travel and neither were they screened at a port of entry. Individuals whose case histories were not filled, or information was missing were labelled as unknown.
