# Supplementary material for: Tracking the introduction and spread of SARS-CoV-2 in coastal Kenya
Source: Research Square preprint supplement (doi:10.21203/rs.3.rs-93975/v1), 2020-10-26
Supplement: Supplementary file 2 [file b0b3d7b0202580e5c4fbcc5b.docx]

| Phase | Eligibility | Comments |
| --- | --- | --- |
| Phase 1 | - Showed specific symptoms of respiratory illness - Recent international travel - Close contacts of a confirmed case | Before confirmed case |
| Phase 2 | - Showed specific symptoms of respiratory illness - Recent international travel - Close contacts of a confirmed case - International visitors were taken to isolation centres | After first confirmed case |
| Phase 3 | - Mass testing rolled out at KPA and general public in Mombasa island | After suspected community transmission |
| Phase 4 | - Mass testing for truck drivers entering Kenya | A number of cases reported by Uganda border surveillance team |

**Table S2:** A table summarising the public health responses that were taken by the Ministry of Health in response to increasing number of cases. The definitions provided influenced the decision on who was tested. Here we divided the responses into 4 phases.
