# Supplementary material for: Tracking the introduction and spread of SARS-CoV-2 in coastal Kenya
Source: Research Square preprint supplement (doi:10.21203/rs.3.rs-93975/v1), 2020-10-26

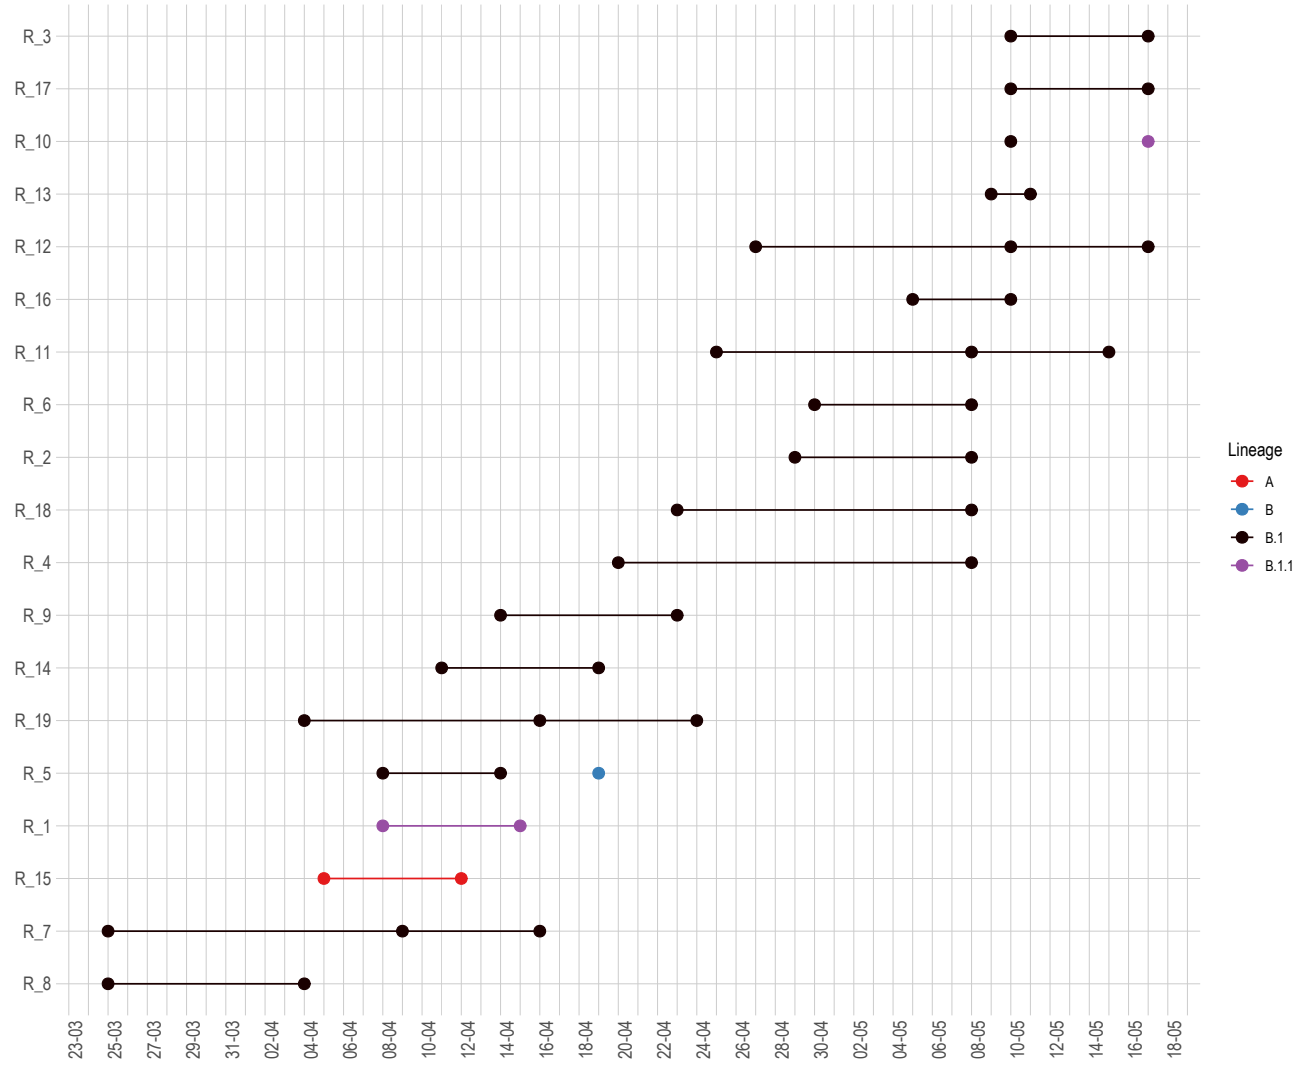

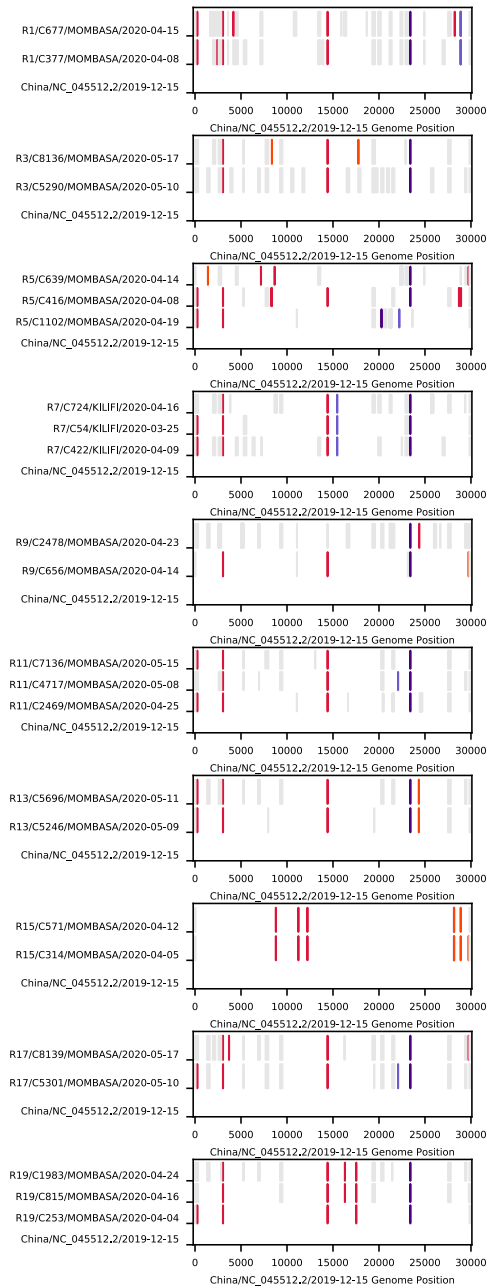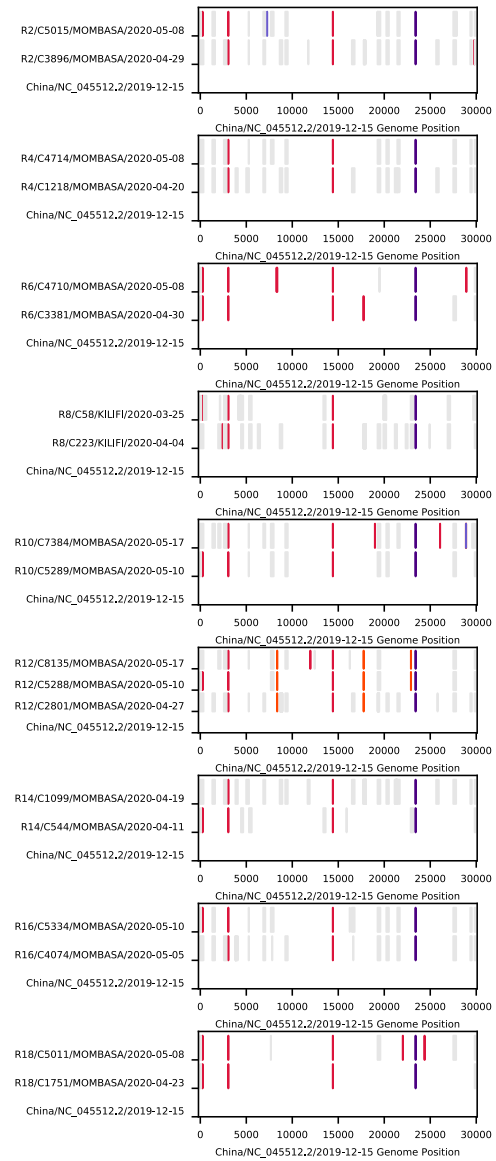

Supplement: Supplementary file [file 0b914e82993710edcdbe121c.pdf]
